# Supplementary material for: The Sequence Characteristics and Binding Properties of the Odorant-Binding Protein SvelOBP1 from Sympiezomias velatus (Coleoptera: Curculionidae) to Jujube Volatiles
Source: MDPI journal article supplement (doi:10.3390/life14020192), 2024-01-29
Supplement: s1 [file s1]

1 ATGTCTAAAATTATAGGTCTGTTGGTATTAGTGTTGTTTACTGTTGGTAATGCTAAGATAACTTTACCTCCTGAGCTCCAAGAATACGTCGATGACTTACACAAACTATGTATTTCAAAA  
1 M S K I I G L L V L V L F T V G N A K I T L P P E L Q E Y V D D L H K L C I S K  
121 AGTGGAATTACTGAGGATGACCACCAAGCTTATGATATATCCAATAAGGACCAAAAAATGATGTGCTATATGAAATGTCTTATGCTGGAGTCTAAGTGGATGAAACCCAGTGGTGAAATC  
41 S G I T E D D H Q A Y D I S N K D Q K M M C Y M K C L M L E S K W M K P S G E I  
241 GATTATGCTTATATTGAAGAACAAGCTCATCCAGACGTAAAAGATATTTTAATGGCTGCTCTTAACACATGCAAAGTTATTAACGACGGAGCTGATCTTTGTGAAAAATCCTATAACTTC  
81 D Y A Y I E E Q A H P D V K D I L M A A L N T C K V I N D G A D L C E K S Y N F  
361 AACCTCTGTCTTCATGAAGCTGACCCTGTGAACCTGGTTCTTTGTGTAA  
121 N L C L H E A D P V N W F F V \*
