# Supplementary material for: The Sequence Characteristics and Binding Properties of the Odorant-Binding Protein SvelOBP1 from Sympiezomias velatus (Coleoptera: Curculionidae) to Jujube Volatiles
Source: MDPI journal article supplement (doi:10.3390/life14020192), 2024-01-29
Supplement: s1 [file s1]

## Supplementary Materials

**Table S1 Molecular docking of SvelOBP1 with 24 ligands**

| Number        | Ligands                            | K <sub>i</sub> ( $\mu$ M) | Binding energy (kcal/mol) | Hydrogen bond | Hydrophobic interaction                   | Van der Waals force                                                    |
|---------------|------------------------------------|---------------------------|---------------------------|---------------|-------------------------------------------|------------------------------------------------------------------------|
| <b>Esters</b> |                                    |                           |                           |               |                                           |                                                                        |
| 1             | Dibutyl benzene-1,2-dicarboxylate  | 6.66 $\pm$ 0.03           | -6.71                     | Trp114,Phe115 | Leu8,Val75,Leu79,Asn113,Val117            | Ile2,Leu4,Leu49,His72,Ile78,Asn103,Ala109,Asp110                       |
| 2             | Ethyl 2-methylbutyrate             | 9.37 $\pm$ 0.08           | -5.98                     | –             | Leu15,Leu49,Met50,Trp55,Phe102,Leu106     | Tyr11,Val12,Met46,Ser53,Asn103,Phe116,Val117                           |
| 3             | Butyl acetate                      | 10.94 $\pm$ 0.39          | -3.68                     | Ile67         | Leu8,Ala71,His72,Val75,Leu79              | Tyr11,Ser53,Trp55,Tyr66,Gln70                                          |
| 4             | [(Z)-hex-3-enyl] 2-methylbutanoate | 11.15 $\pm$ 0.16          | -5.28                     | Asp110,Leu106 | Ile2,Val75,Ile78,Leu79,Trp114,Phe115      | Trp55,Ala82,Asn103,Ala109,Val117                                       |
| 5             | Ethyl pentanoate                   | 11.73 $\pm$ 0.26          | -3.97                     | Trp114        | Ala82,Leu106,Phe115                       | Ile2,Ile78,Leu79,His107,Ala109,Asp110,Asn113                           |
| 6             | Ethyl butyrate                     | 11.79 $\pm$ 0.13          | -3.67                     | –             | Val2,Tyr11,Leu15,Met50,Trp55,Phe102,Val17 | Ser53,Mey46,Asn103,Leu49,Leu106,                                       |
| 7             | [(Z)-hex-3-enyl] 3-methylbutanoate | 11.94 $\pm$ 0.13          | -4.85                     | Trp114,Phe115 | Leu49,Met50,Ala82,Leu106                  | Ile2,Met46,Trp55,Leu79,Ile78,Asn103,His107,Asp110,Asn113,Val117,Phe116 |

|                   |                                                  |              |       |               |                                                                      |                                                                                       |
|-------------------|--------------------------------------------------|--------------|-------|---------------|----------------------------------------------------------------------|---------------------------------------------------------------------------------------|
| 8                 | [(Z)-hex-3-enyl] acetate                         | 12.01 ± 0.09 | -4.43 | –             | Phe115,Val117                                                        | Ile2,Trp55,Ile78,Leu79,Ala82,Leu106,Asp110,Asn113,Trp114,Phe116                       |
| 9                 | [(E)-hex-2-enyl] hexanoate                       | 12.06 ± 0.05 | -5.38 | His72         | Ile2,Trp55,Tyr66                                                     | Leu4,Leu8,Ser53,Ile67,Gln70,Ala71,Val75,Ile78,Leu79,Ala82,Asp110,Asn113,Trp114,Phe115 |
| 10                | [(Z)-hex-3-enyl] butanoate                       | 12.90 ± 0.75 | -4.48 | Leu79,Asp110  | Ile2,Val75,Trp114,Phe115                                             | Leu4,Leu8,Trp55,Ile78,Ala82,Leu106,Ala109,Asn113                                      |
| <b>Alcohols</b>   |                                                  |              |       |               |                                                                      |                                                                                       |
| 11                | (Z)-hex-3-en-1-ol                                | 7.98 ± 0.08  | -6.28 | Trp114,Phe115 | Ile2,Ile78                                                           | Leu79,Ala82,Leu106,His107,Asp110,Asn113                                               |
| 12                | Phenylmethanol                                   | 9.40 ± 0.23  | -4.10 | Phe115        | Ala82,Asn113                                                         | Ile2,Ile78,Leu79,Leu106,Ala109,Asp110,Trp114                                          |
| 13                | 3,7-dimethylocta-1,6-dien-3-ol                   | 11.29 ± 0.13 | -5.12 | Asp110        | Ala82,Leu106,Trp114,Phe115                                           | Ile2,Leu4,Trp55,Ile78,Leu79,Leu83,His107,Asn113,Val117                                |
| 14                | 1,3,3-trimethyl-2-oxabicyclo[2.2.2]octane        | 11.48 ± 0.11 | -5.48 | –             | Ile2,Leu79,Ala82,Leu106,Trp114,Phe116                                | Ile78,Leu83,Ala109,Asp110,Asn113                                                      |
| 15                | (2E,6E)-3,7,11-trimethyldodeca-2,6,10-trien-1-ol | 11.93 ± 0.14 | -4.09 | Tyr66,Ile67   | Tyr11,Val12,Leu49,Mey50,Trp55,Ala71,Leu79,Val117                     | Leu8,Leu15,Met46,Ser53,Gln70,His72,Asn103,Leu106                                      |
| 16                | Oct-1-en-3-ol                                    | 12.61 ± 0.11 | -4.39 | Leu106        | Ile2,Ile78,Phe115,Val117                                             | Trp55,Leu79,Ala82,Leu106,His107,Ala109,Asp110,Asn113,Trp114                           |
| 17                | (E)-hex-2-en-1-ol                                | 12.83 ± 0.12 | -3.61 | Phe115        | Ile2,Ile78                                                           | Leu79,Ala82,Leu106,Asp110,Asn113,Trp114                                               |
| <b>Terpenoids</b> |                                                  |              |       |               |                                                                      |                                                                                       |
| 18                | (3E,6E)-3,7,11-trimethyldodeca-1,3,6,10-tetraene | 8.73 ± 0.09  | -6.41 | –             | Ile2,Leu15,Leu49,Met50,Trp55,Ile78,Ala82,Leu106,Trp114,Phe115,Val117 | Met46,Ser53,Leu79,Phe102,Asn103,His107,Asp110,Asn113,Phe116                           |

|               |                                           |              |       |       |                                              |                                                                                                   |
|---------------|-------------------------------------------|--------------|-------|-------|----------------------------------------------|---------------------------------------------------------------------------------------------------|
| 19            | 3,7-dimethylocta-1,3,6-triene             | 9.25 ± 0.05  | -5.27 | –     | Trp55,Ile78,Leu79,Ala82,Leu106,Trp114,Val117 | Ile2,Asn103,His107,Ala109,Asp110,Asn113,Phe115,Phe116                                             |
| 20            | 2-methyl-5-propan-2-ylcyclohexa-1,3-diene | 9.71 ± 0.06  | -5.36 | –     | Ile78,Ala82,Leu106,Trp114                    | Ile2,Leu79,Asn103,Asp110,Asn113,Phe115,Phe116,Val117                                              |
| 21            | 1-methyl-4-prop-1-en-2-ylcyclohexene      | 10.90 ± 0.01 | -5.21 | –     | Ala82,Leu106,Trp114,Val17                    | Ile2,Trp55,Ile78,Leu79,Asn103,His107,Asp110,Asn113,Phe115,Phe116                                  |
| 22            | 3,7,7-trimethylbicyclo[4.1.0]hept-3-ene   | 12.10 ± 0.06 | -3.46 | –     | Ile2,Ile78,Ala82,Leu106,Trp114,Phe115        | Trp55,Leu79,His107,Ala109,Asp110,Asn113                                                           |
| <b>Others</b> |                                           |              |       |       |                                              |                                                                                                   |
| 23            | 1-(4-ethylphenyl)ethanone                 | 10.91 ± 0.13 | -5.48 | Trp55 | Leu8,Gln70,Ala71,Val75,Leu79                 | Leu4,Tyr11,Ser53,Tyr66,Ile67,His72                                                                |
| 24            | Hexadecanoic acid                         | 11.71 ± 0.27 | -3.45 | –     | Ala82,Leu106,Trp114                          | Ile2,Leu8,Trp55,Ser53,Tyr66,Ile67,Gln70,Ala71,His72,Val75,Ile78,Leu79,His107,Ala109,Asp110,Asn113 |

---
