# Supplementary figures and images for: The Sequence Characteristics and Binding Properties of the Odorant-Binding Protein SvelOBP1 from Sympiezomias velatus (Coleoptera: Curculionidae) to Jujube Volatiles
Source: MDPI journal article supplement (doi:10.3390/life14020192), 2024-01-29

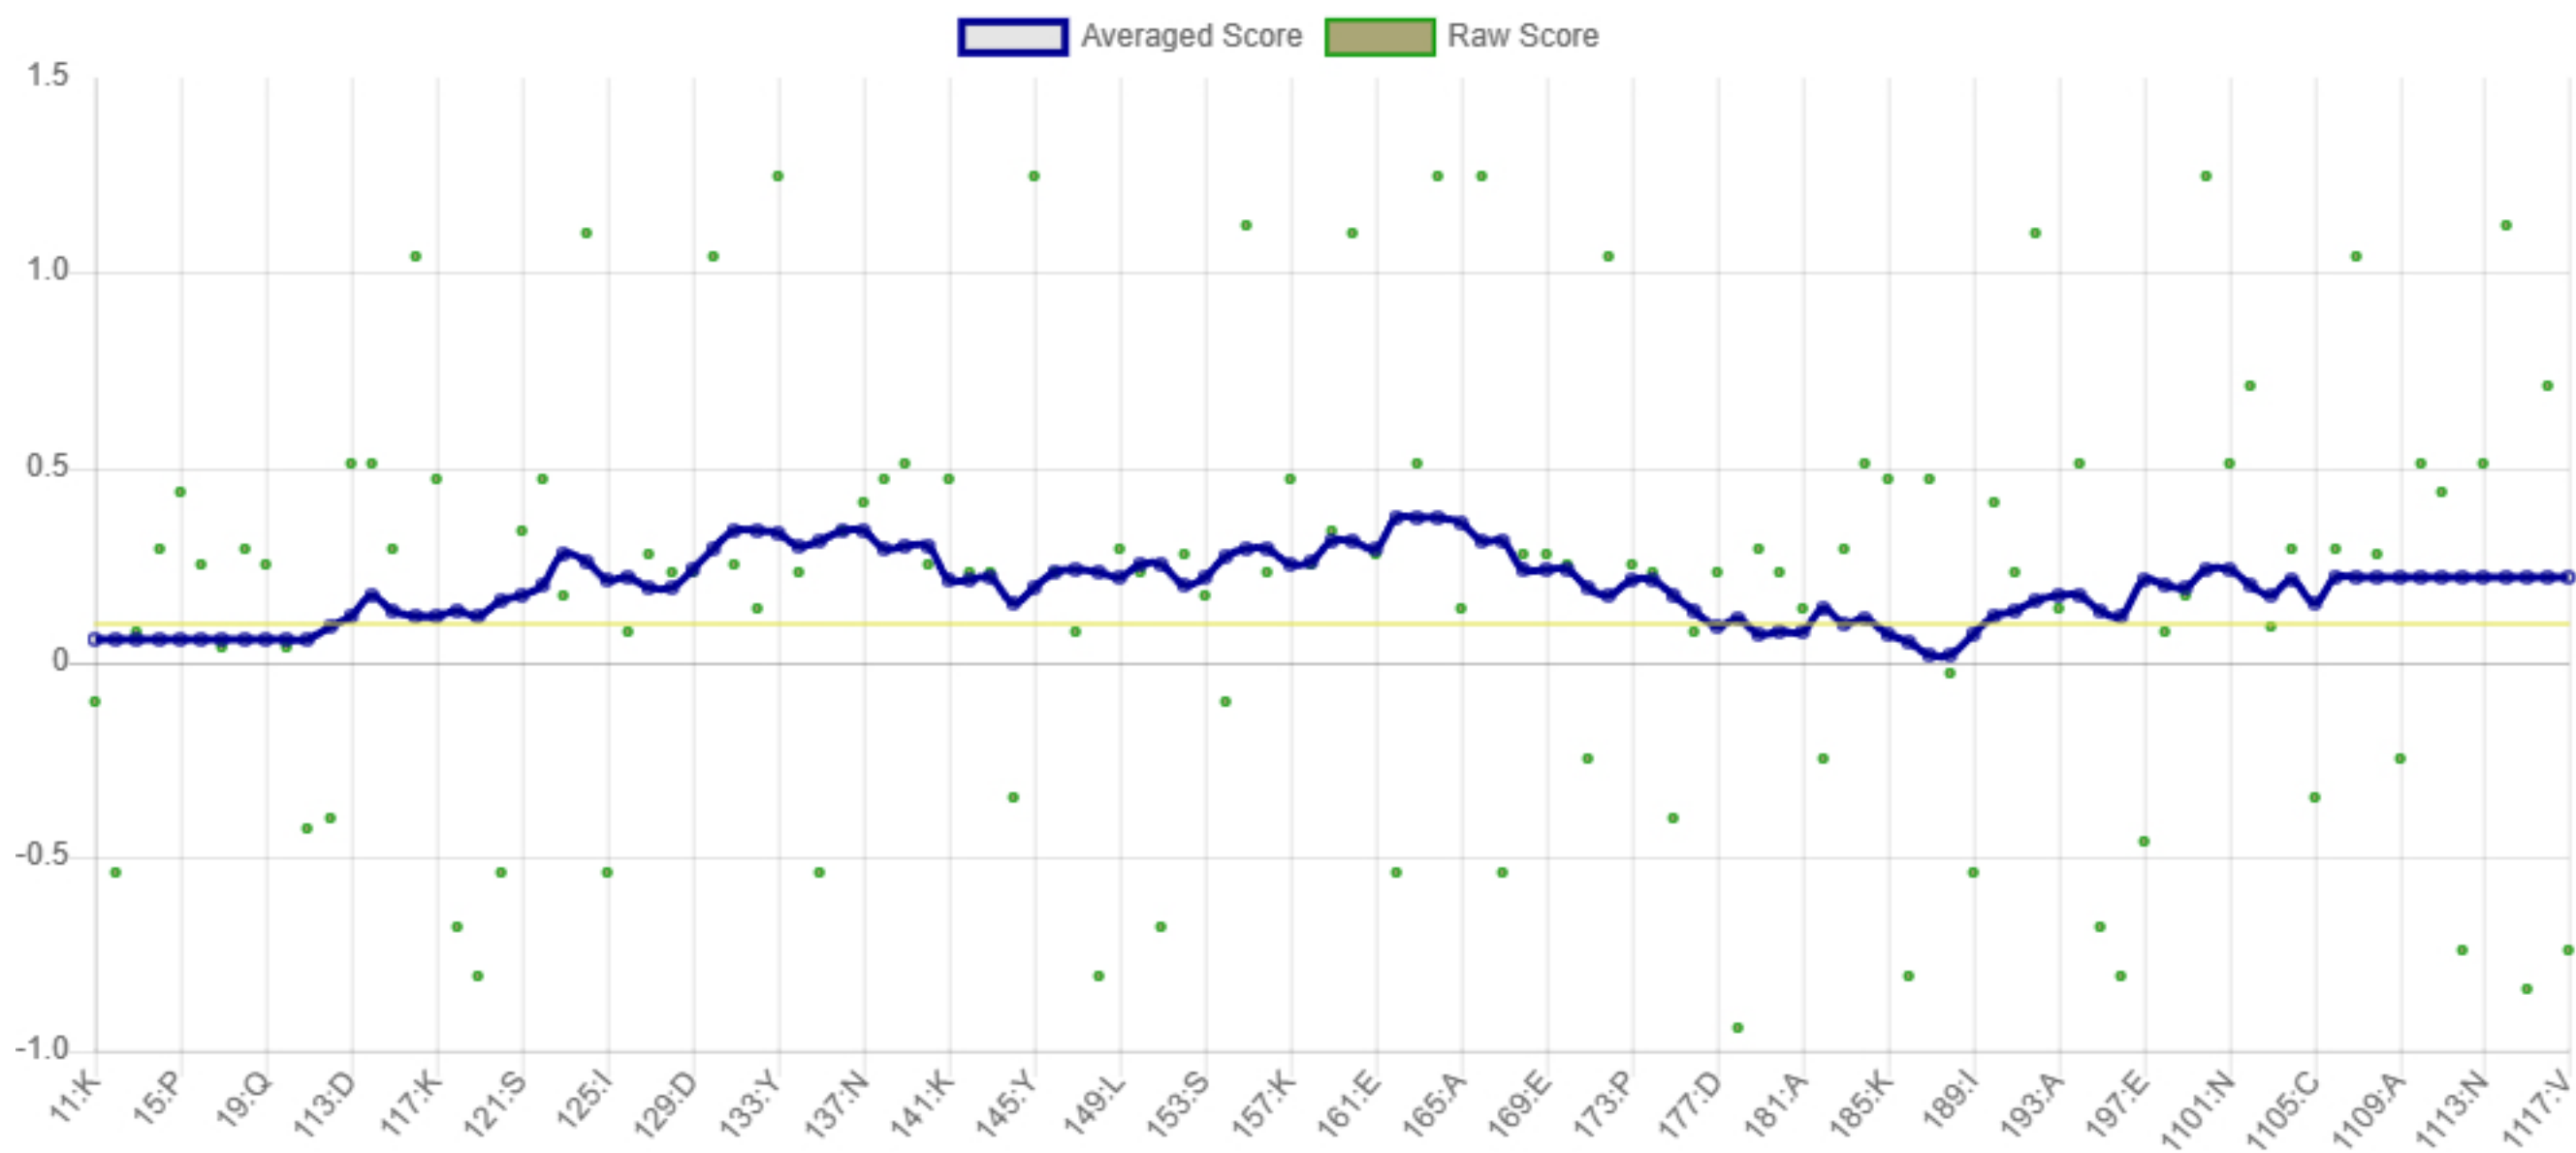

Supplement: s1 [file s1]
